# Supplementary material for: Mistranslation and ageing unmask FUS and TDP-43 toxicity in yeast models of neurodegenerative diseases
Source: Research Square preprint supplement (doi:10.21203/rs.3.rs-6448360/v1), 2025-05-13
Supplement: Supplementary file 1 [file ab946375b7e4d1236b58143c.xlsx]

## Sheet: Supp Table 2_Plasmids
Supplementary Table 1: Plasmids used in this study.
Plasmid	ORF	Citation
pRS413	empty	This study
pRS415	empty	This study
pRS416	empty	This study
pRS413 MET17 TDP-43	TDP-43	This study
pRS413 MET17 FUS	FUS	This study
pRS413 MET17 FUS-YFP	FUS with C terminal YFP fusion	This study
pRS413 GPD TDP43-YFP	TDP-43 with C terminal YFP fusion	This study
pAG413 GAL TDP-43	TDP-43	This study
pRS405 GAL FUS	FUS	Sun et al. 2011
pRS425 MET17 FFL-GFP	FFLD50N,G119N with C terminal GFP fusion	Tkach and Glover 2008
pAG416 GPD ccdB mCherry	destination vector for gateway cloning	This study
pAG416 GPD FFL-mCherry	FFLD50N,G119N with C terminal mCherry fusion	This study
pAG416 GPD FUS-mCherry	FUS with C terminal mCherry fusion	This study
pAG416 GPD TDP43-mCherry	TDP-43 with C terminal mCherry fusion	This study
pSUP17-wt	SUP17	Berg et al. 2019
pSUP17-P>Sweak	sup17-UGG-G9A	Berg et al. 2019
pSUP17-P>Sstrong	sup17-UGG-G26A	Berg et al. 2019
pSUP17-R>S	sup17-UCU-G26A	Berg et al. 2019
