# Supplementary material for: Mistranslation and ageing unmask FUS and TDP-43 toxicity in yeast models of neurodegenerative diseases
Source: Research Square preprint supplement (doi:10.21203/rs.3.rs-6448360/v1), 2025-05-13
Supplement: Supplementary file 1 [file b8d2c1ad04627085e0426c3b.pdf]

## SUPPLEMENTARY FIGURES

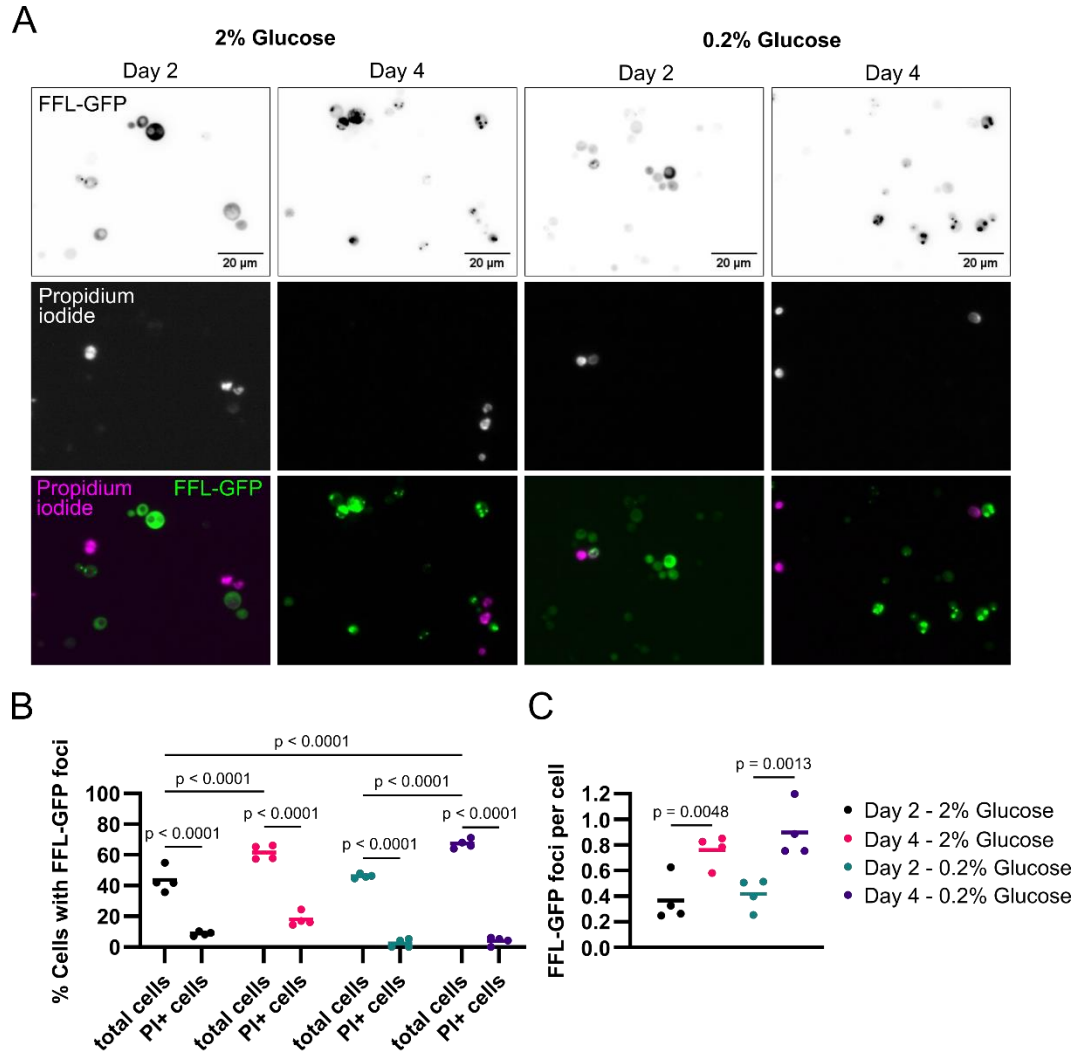

**Figure S1. Ageing induces misfolding of metastable firefly luciferase.** A. Fluorescence microscopy of cells expressing FFL-GFP aged in media containing 2% or 0.2% glucose for two or four days and subsequently stained with propidium iodide. B. Quantification of the percentage of cells containing FFL-GFP foci. C. Quantification of the number of FFL-GFP foci per cell. The means ( $\pm$  SD) are represented graphically for three independent experiments. At least 500 cells were analyzed for each condition.



*Δhsp42Δhsp26* cells expressing either vector control or TDP-43. The means ( $\pm$  SD) are represented graphically for three independent experiments. For fluorescence microscopy, at least 500 cells were analyzed for each condition. # symbols indicate synergistic interactions when compared to wild-type (#  $p < 0.05$ ).

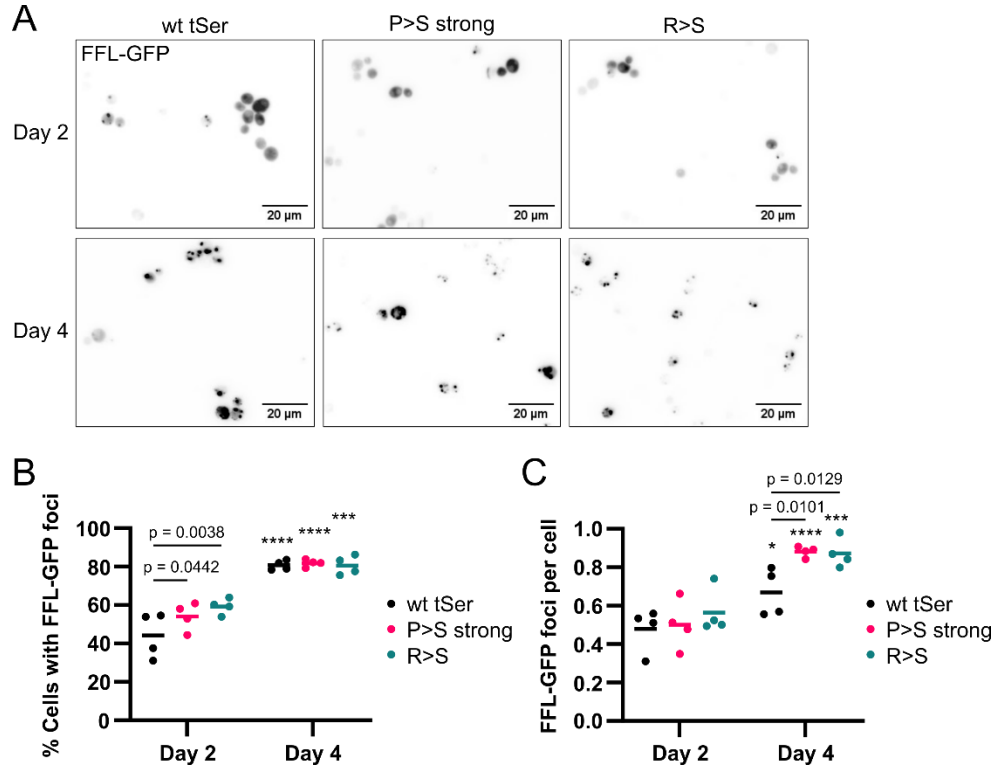

**Figure S3. Translation errors synergistically increase misfolding of metastable firefly luciferase.** A. Fluorescence microscopy of cells expressing FFL-GFP and either wt tSer or the tSer variants P>S strong or R>S aged for two or four days. B. Quantification of the percentage of cells with FFL-GFP foci. C. Quantification of the number of FFL-GFP foci per cell. The means ( $\pm$  SD) are represented graphically for three independent experiments. At least 500 cells were analyzed for each condition. (\*  $p < 0.05$ , \*\*  $p < 0.01$ , \*\*\*  $p < 0.001$ , \*\*\*\*  $p < 0.0001$ ).
